# Supplementary material for: Graft immaturity and safety concerns in transplanted human kidney organoids
Source: PubMed Central journal article supplement (PMC6881327; doi:10.1038/s12276-019-0336-x), 2019-11-28
Supplement: 12276_2019_336_MOESM1_ESM.pdf [file 12276_2019_336_MOESM1_ESM.pdf]

**Supplemental Figure 1. Structural changes in nephron-like structures after transplantation.**

(A): Representative confocal fluorescence images showing podocyte (NPHS1) and parietal epithelial cells (Claudin 1) populations in kidney organoids *in vitro* and the transplanted kidney organoids. Scale bars, 50µm. (B): Quantification of diameter of Bowman's space (kidney organoids *in vitro* (n=12) vs. transplanted kidney graft (n=3). \*, p< 0.05) (C): Representative confocal fluorescence images showing proximal tubular epithelial cells (LTL) populations in kidney organoids *in vitro* and the transplanted kidney organoids. Scale bars, 50µm. (D): Quantification of diameter of lumens of tubule-like structures (kidney organoids *in vitro* (n=12) vs. transplanted kidney graft (n=3). \*, p< 0.05)

**Supplemental Figure 2. Alternative differentiation protocols do not produce more mature cells.**

(A): Representative confocal immunofluorescence images from two additional batches of organoids distinct from the batch shown in Figure 5 for the Morizane and Takasato protocols, scaled identically to those images. (B): Identical images as those shown in Figure 5A, with the scaling increased to the point of being overexposed in the tissue sections. Scale bars, 50 µm.

**Supplemental Figure 3.** Outgrowth of kidney organoids 7 days after implantation on glass plates coated with 3 % GelTrex. Scale bars, 600µm.

**Supplemental Figure 4.** Representative images of the transplanted kidney organoids graft at 2 weeks and 6weeks after renal subcapsular transplantation on NOD-SCID mouse kidney. Open arrows and black arrows indicate the kidney organoids graft at 2 weeks and 6weeks after transplantation, respectively. Scale bars, 2mm.

**Supplemental Figure 5.** (A): Representative images of H&E staining and immunohistochemical staining for safranin O of the kidney organoids transplanted with kidney dECM at 6 weeks after transplantation. Scale bars, 500 µm. (B): Quantification of diameter of cartilages at 6 weeks after

transplantation. (transplanted kidney organoids (n=6) vs. transplanted kidney organoids with kidney dECM (n=6). \*,  $p < 0.05$ ).

# Supplemental Figure 1

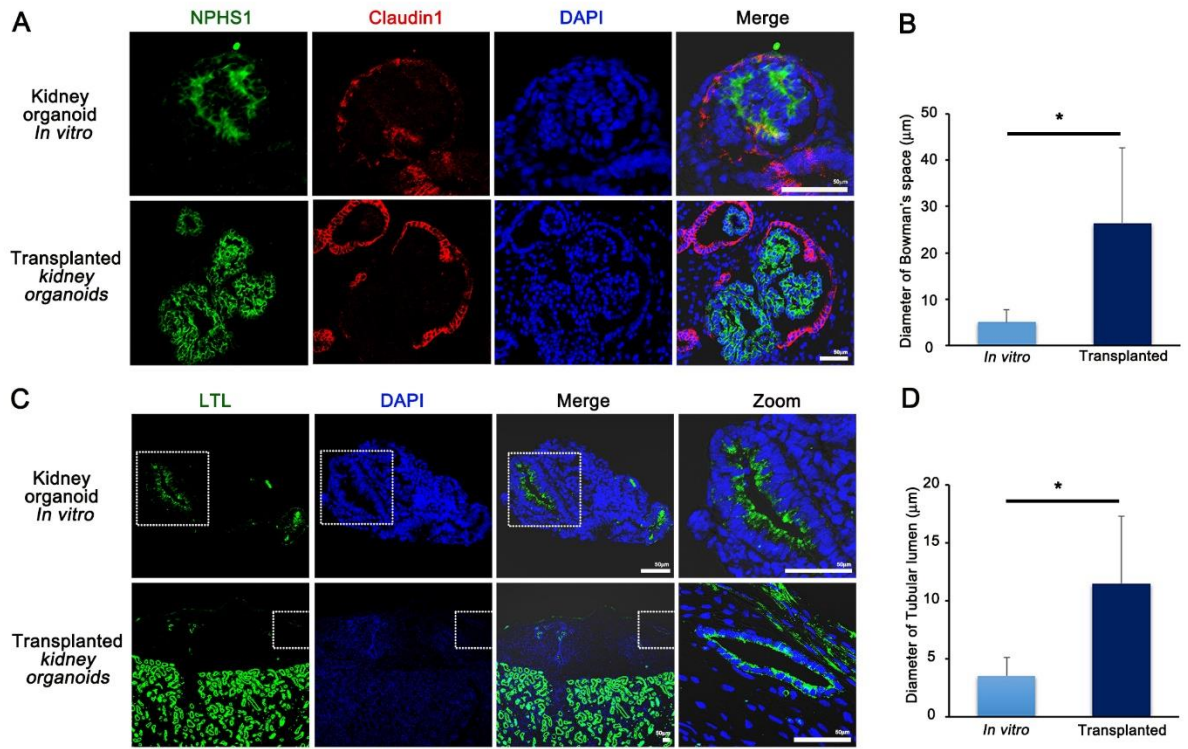

## Supplemental Figure 2

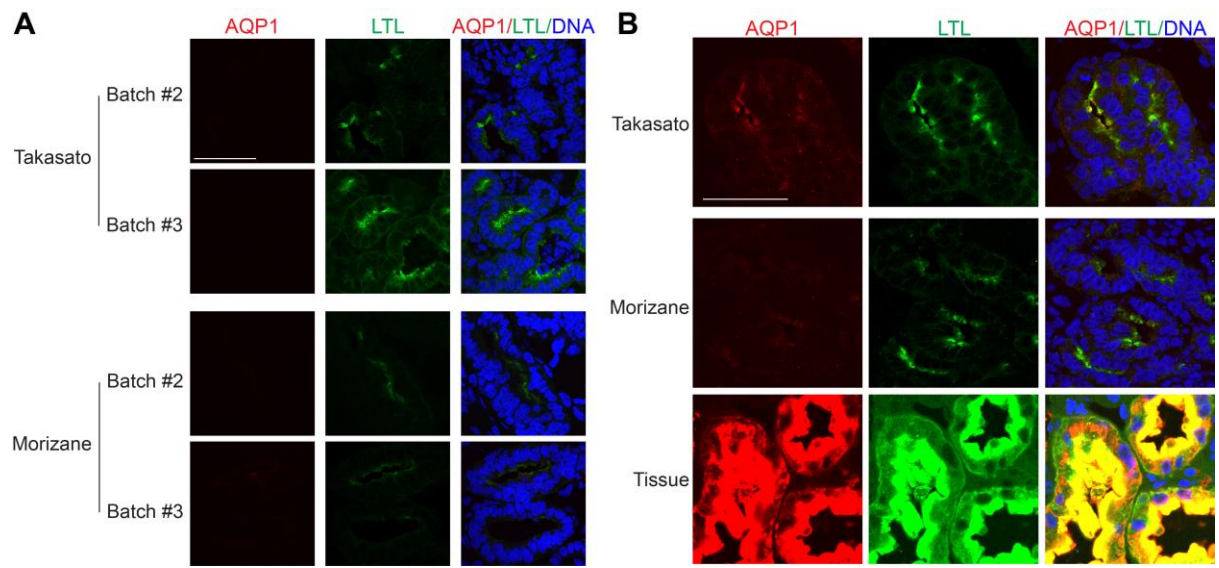

Supplemental Figure 3

**Day 0**

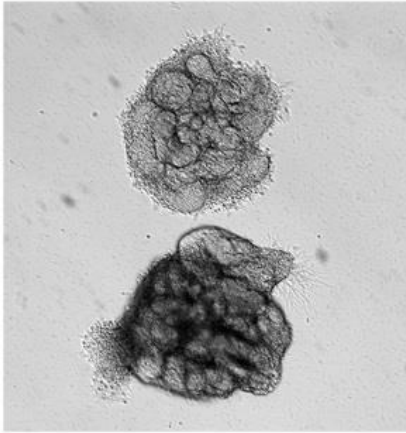

**Day 7**

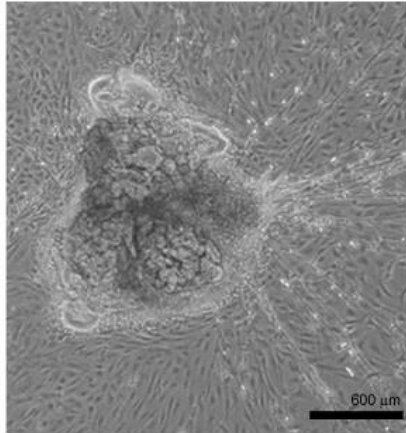

Supplemental Figure 4

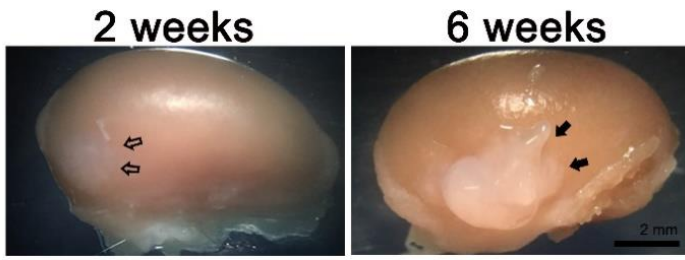

Supplemental Figure 5

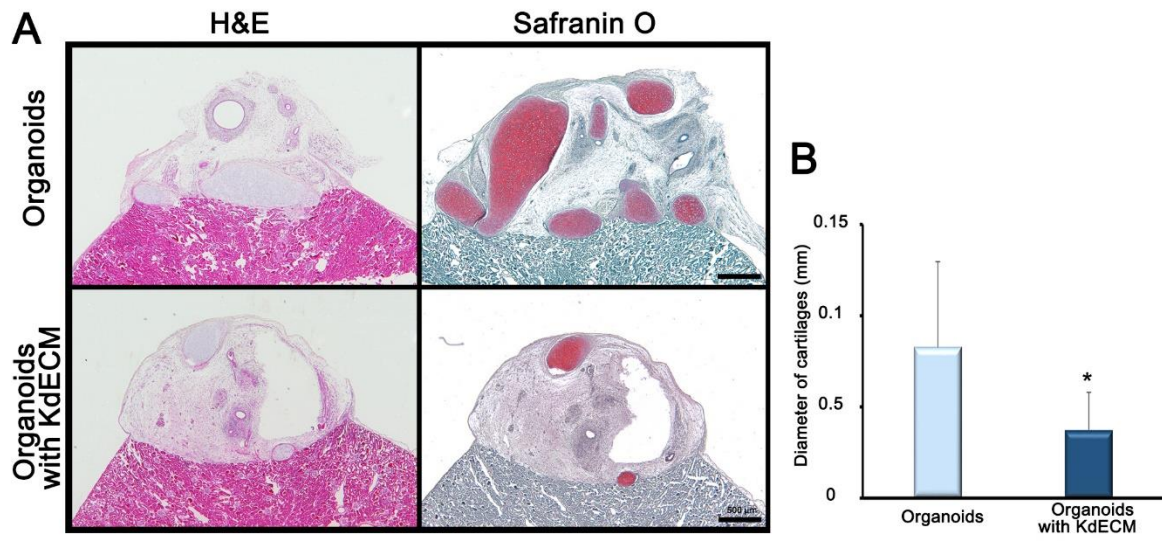

**Supplemental Table 1.** Top 20 down-regulated leading-edge genes in subset of cell cycles

| Gene Symbol | Gene Name                                                   |
|-------------|-------------------------------------------------------------|
| HIST1H2AJ   | histone cluster 1 H2A family member j                       |
| DBF4        | DBF4 zinc finger                                            |
| CDK1        | cyclin dependent kinase 1                                   |
| HIST1H2BH   | histone cluster 1 H2B family member h                       |
| ZWILCH      | zwilch kinetochore protein                                  |
| DNA2        | DNA replication helicase/nuclease 2                         |
| PLK4        | polo like kinase 4                                          |
| CCNB2       | cyclin B2                                                   |
| KIF18A      | kinesin family member 18A                                   |
| MCM10       | minichromosome maintenance 10 replication initiation factor |
| CDC6        | cell division cycle 6                                       |
| ORC6        | origin recognition complex subunit 6                        |
| CCNB1       | cyclin B1                                                   |
| NEK2        | NIMA related kinase 2                                       |
| E2F3        | E2F transcription factor 3                                  |
| NPM1        | nucleophosmin 1                                             |
| CENPN       | centromere protein N                                        |
| CENPH       | centromere protein H                                        |
| NDC80       | NDC80, kinetochore complex component                        |
| CDC7        | cell division cycle 7                                       |



**Supplemental Table 2.** Top 20 up-regulated leading-edge genes in subset of extracellular matrix organization

| Gene Symbol | Gene Name                                                 |
|-------------|-----------------------------------------------------------|
| COL12A1     | collagen type XII alpha 1 chain                           |
| MMP7        | matrix metalloproteinase 7                                |
| COL14A1     | collagen type XIV alpha 1 chain                           |
| COL15A1     | collagen type XV alpha 1 chain                            |
| COL8A1      | collagen type VIII alpha 1 chain                          |
| MMP13       | matrix metalloproteinase 13                               |
| COL3A1      | collagen type III alpha 1 chain                           |
| COL5A1      | collagen type V alpha 1 chain                             |
| COL21A1     | collagen type XXI alpha 1 chain                           |
| COL6A2      | collagen type VI alpha 2 chain                            |
| MMP8        | matrix metalloproteinase 8                                |
| MMP3        | matrix metalloproteinase 3                                |
| COL1A1      | collagen type I alpha 1 chain                             |
| COL16A1     | collagen type XVI alpha 1 chain                           |
| COL19A1     | collagen type XIX alpha 1 chain                           |
| CTRB1       | chymotrypsinogen B1                                       |
| TPSAB1      | tryptase alpha/beta 1                                     |
| TLL1        | tolloid like 1                                            |
| ADAMTS2     | ADAM metalloproteinase with thrombospondin type 1 motif 2 |
| COL4A4      | collagen type IV alpha 4 chain                            |
